# Supplementary material for: Photocontrolled DNA minor groove interactions of imidazole/pyrrole polyamides
Source: publisher site journal article supplement (doi:10.3762/bjoc.16.8), 2020-01-09
Supplement: Additional file 4 [file 1860-5397-16-8-S4.pdf]

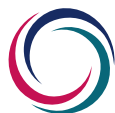

## Supporting Information

for

### Photocontrolled DNA minor groove interactions of imidazole/ pyrrole polyamides

Sabrina Müller, Jannik Paulus, Jochen Mattay, Heiko Ihmels, Veronica I. Dodero  
and Norbert Sewald

*Beilstein J. Org. Chem.* **2020**, *16*, 60–70. doi:10.3762/bjoc.16.8

### HRMS spectra of P1–P3

# Compound P1

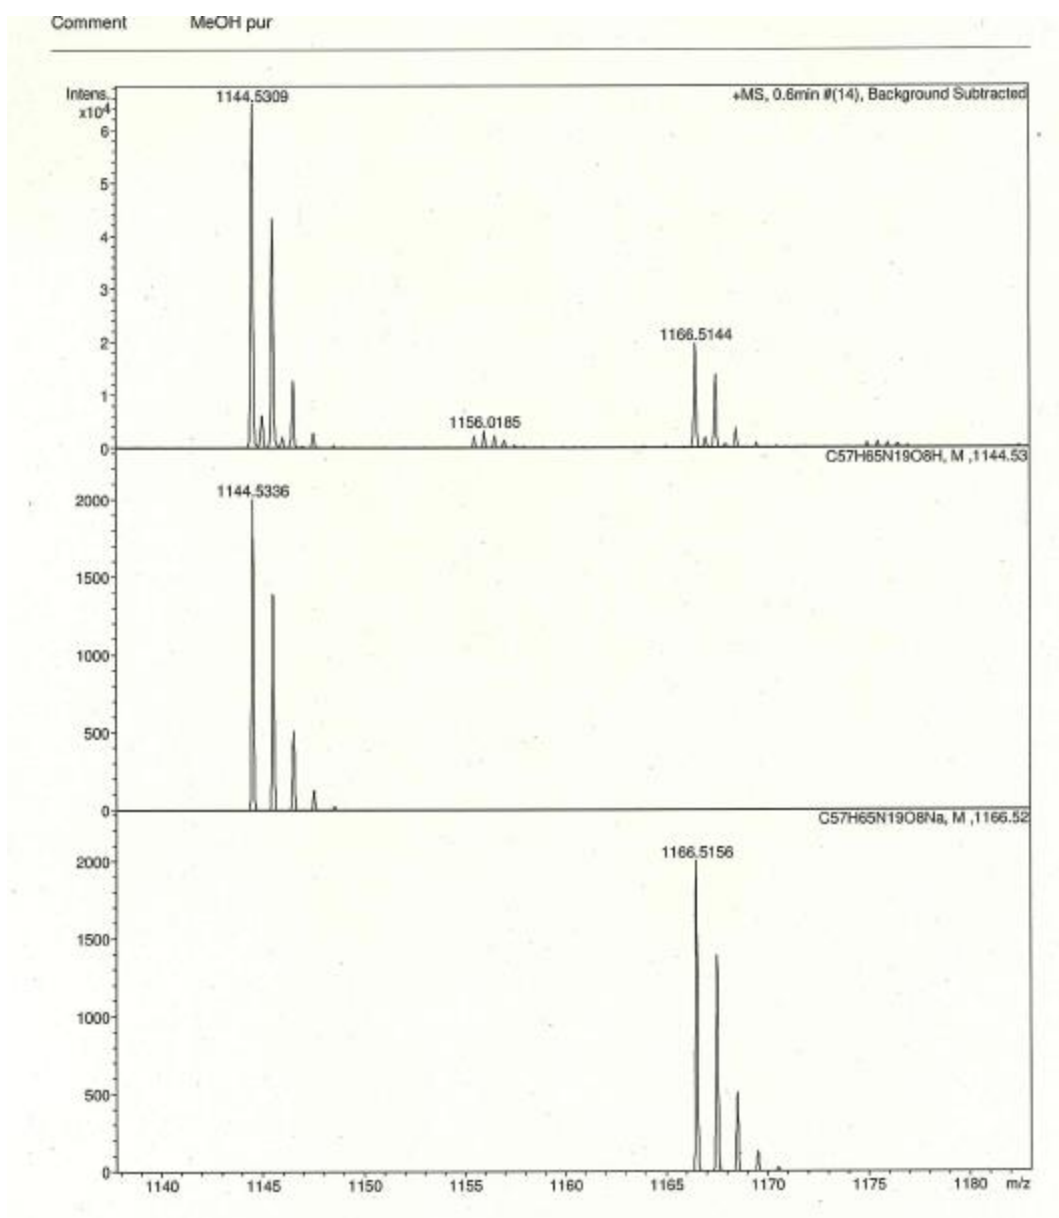

# Compound P2

Comment MeOH pur

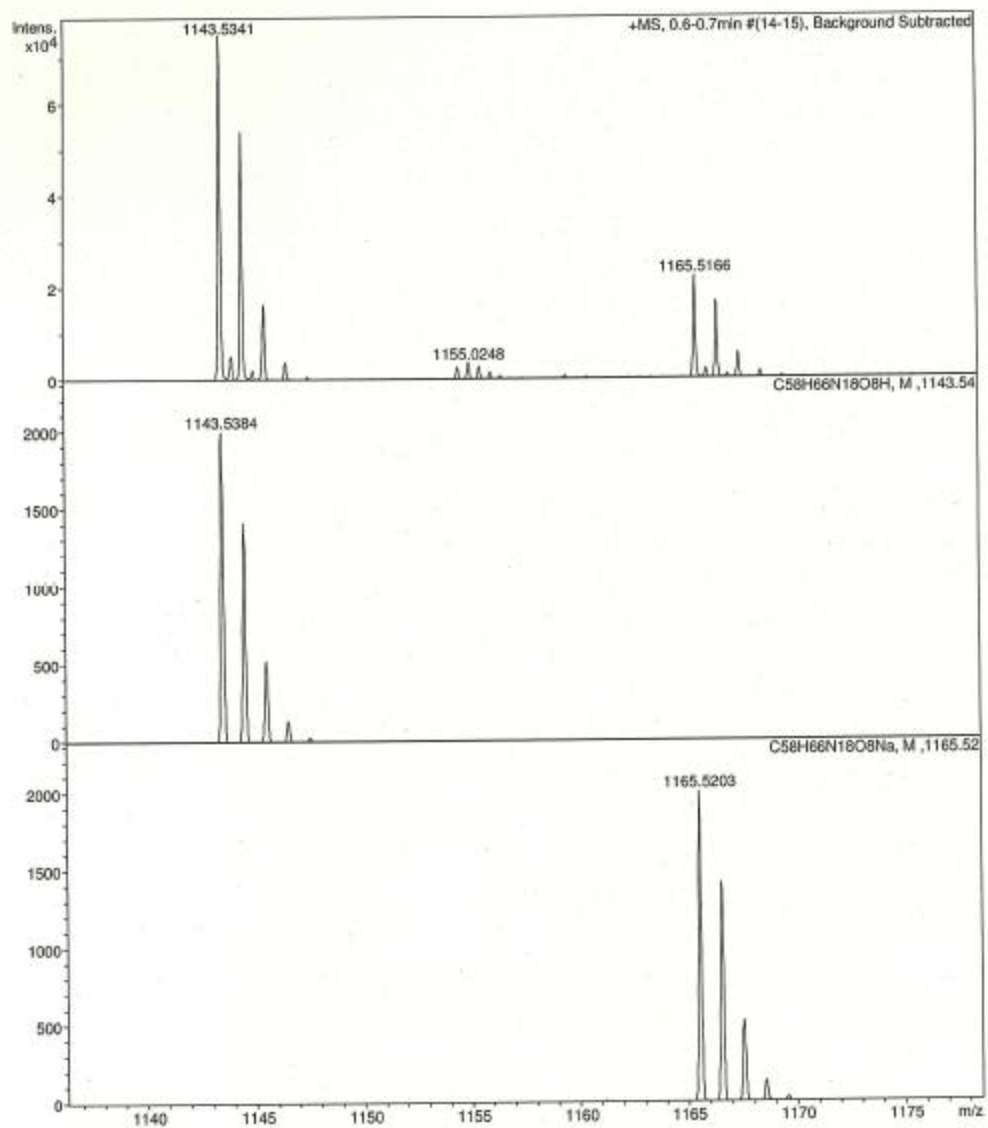

# Compound P3

Bielefeld\_AN662\_150323094608 15/03/23 09:46:08 Sample in MeOH  
Orbitrap XXL Organisch Chemisches Institut WWU Muenster

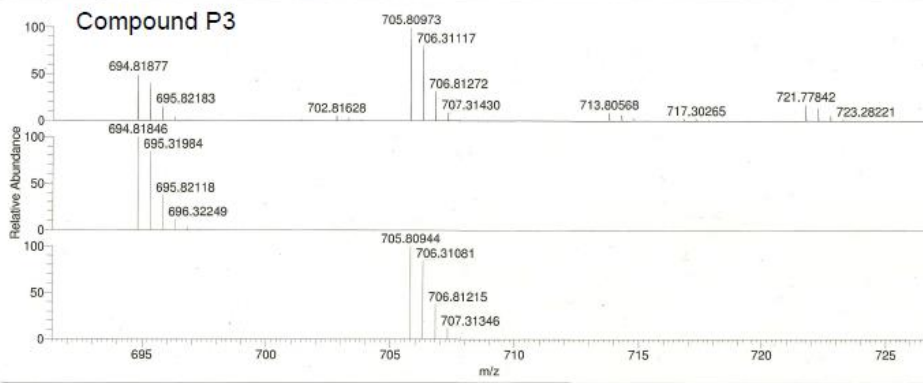

NL: 1.61E7  
Bielefeld\_AN662\_150323094608  
#63-78 RT: 0.97-1.19 AV: 16 T:  
FTMS + p NSI Full ms  
[200.00-2000.00]

NL: 4.23E5  
C<sub>69</sub>H<sub>77</sub>N<sub>23</sub>O<sub>13</sub>H<sub>2</sub>:  
C<sub>69</sub>H<sub>78</sub>N<sub>23</sub>O<sub>13</sub>  
c (gs, s /p:40)(Val) Chrg 2  
R: 20000 Res .Pwr. @FWHM

NL: 4.23E5  
C<sub>69</sub>H<sub>77</sub>N<sub>23</sub>O<sub>10</sub>HNa:  
C<sub>69</sub>H<sub>78</sub>N<sub>23</sub>O<sub>10</sub>Na:  
c (gs, s /p:40)(Val) Chrg 2  
R: 20000 Res .Pwr. @FWHM

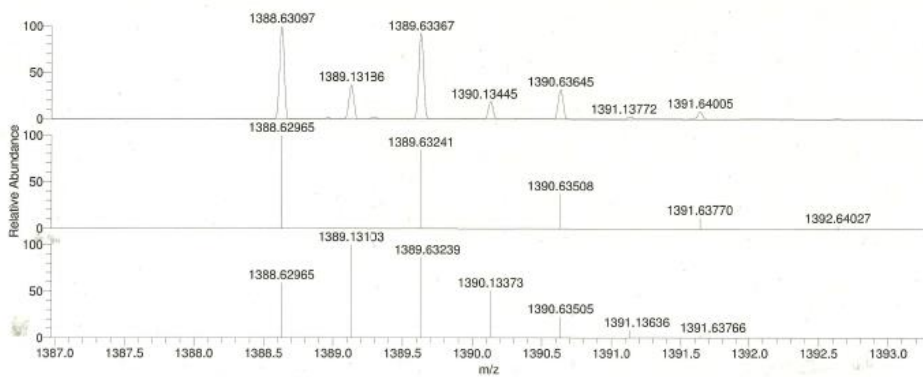

NL: 5.07E8  
Bielefeld\_AN662\_150323094608  
#63-78 RT: 0.97-1.19 AV: 16 T:  
FTMS + p NSI Full ms  
[200.00-2000.00]

NL: 4.23E5  
C<sub>69</sub>H<sub>77</sub>N<sub>23</sub>O<sub>10</sub>H:  
C<sub>69</sub>H<sub>78</sub>N<sub>23</sub>O<sub>10</sub>  
c (gs, s /p:40)(Val) Chrg 1  
R: 20000 Res .Pwr. @FWHM

NL: 3.02E5  
(C<sub>69</sub>H<sub>77</sub>N<sub>23</sub>O<sub>10</sub>H)<sub>2</sub>:  
O<sub>20</sub>N<sub>46</sub>H<sub>156</sub>C<sub>138</sub>  
c (gs, s /p:40)(Val) Chrg 2  
R: 20000 Res .Pwr. @FWHM
